# Supplementary material
Source: publisher site journal article supplement (https://www.dovepress.com/article/484629)

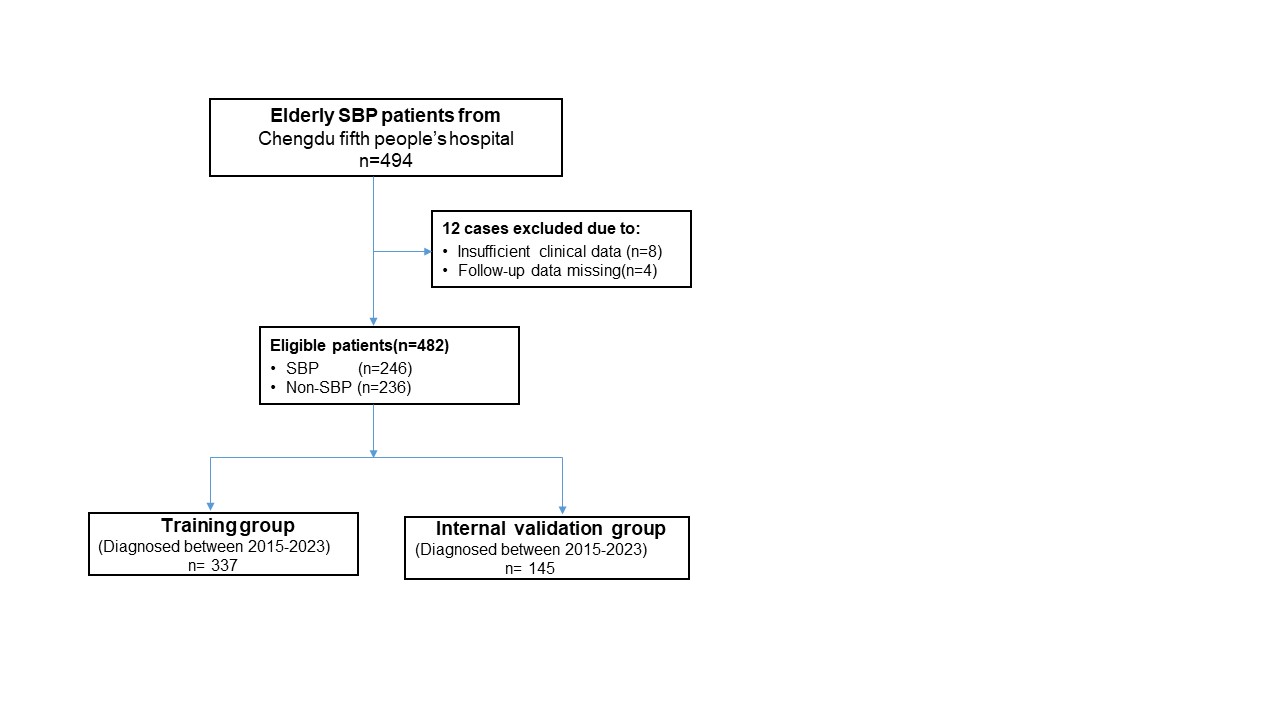


**Figure S1 .** **Screening flowchart for patient selection.** SBP: spontaneous bacterial peritonitis.

Supplement: Supplementary file 1 [file get_supplementary_file.php]
